# Supplementary material for: A Bacterium Isolated From Soil in a Karst Rocky Desertification Region Has Efficient Phosphate-Solubilizing and Plant Growth-Promoting Ability
Source: PubMed Central journal article supplement (PMC7882523; doi:10.3389/fmicb.2020.625450), 2021-02-01
Supplement: Data_Sheet_1.pdf [file Data_Sheet_1.pdf]

**Supplementary Information for:**

**A Bacterium Isolated from Soil in a Karst Rocky  
Desertification Region Has Efficient  
Phosphate-Solubilizing and Plant Growth-Promoting  
Ability**

*Jinge Xie<sup>1</sup>, Zongqiang Yan<sup>1</sup>, Guifen Wang<sup>1</sup>, Wenzhi Xue<sup>2</sup>, Cong Li<sup>1</sup>, Xiwen  
Chen<sup>2</sup>, \*, Defu Chen<sup>1</sup>, \**

---

<sup>1</sup> *Department of Genetics and Cell Biology, College of Life Sciences, Nankai University,  
Tianjin, China*

<sup>2</sup> *Department of Biochemistry and Molecular Biology, College of Life Sciences, Nankai  
University, Tianjin, China*

**\* Correspondence:**

Xiwen Chen: xiwenchen@nankai.edu.cn

Defu Chen: chendefu@nankai.edu.cn

**This file includes:**

Supplementary Materials and methods

Supplementary Table 1-2

Supplementary Figure 1-7

Supplementary Excel 1

## Supplementary Materials and Methods

### Collection of Soil Samples and Isolation of PBS Strains

NBRIP medium:  $\text{Ca}_3(\text{PO}_4)_2$  5 g, glucose 10 g,  $\text{MgCl}_2 \cdot 6\text{H}_2\text{O}$  5 g,  $\text{MgSO}_4 \cdot 7\text{H}_2\text{O}$  0.25 g, KCl 0.2 g, and  $(\text{NH}_4)_2\text{SO}_4$  0.1 g, dissolved in 1 L of distilled water.

Modified NBRIP medium: additionally added  $\text{AlPO}_4$  2.5 g/L and  $\text{FePO}_4$  2.5 g/L as the source of P, as well as the following nutrient substance (40 mL/L soil extract, microelements and organic matter).

The soil extract: 0.5 kg of unfertilized garden soil was taken, after removing debris and then sieved, the soil was placed in a sterile Erlenmeyer flask, and adding 1 L of sterile water. With the mouth of the bottle sealing with a breathable plug, the soil was heated in boiling water for 2 h in a water bath, filtered after cooling, made up to the volume into 1 L with sterile water and stored at 4°C.

The microelements:  $\text{ZnSO}_4 \cdot 7\text{H}_2\text{O}$  8.82 mg,  $\text{MnCl}_2 \cdot 4\text{H}_2\text{O}$  1.44 mg,  $\text{NaMoO}_4 \cdot 2\text{H}_2\text{O}$  1.21 mg,  $\text{CuSO}_4 \cdot 5\text{H}_2\text{O}$  1.57 mg,  $\text{CoCl}_2 \cdot 6\text{H}_2\text{O}$  0.4 mg,  $\text{H}_3\text{BO}_3$  11.42 mg,  $\text{Na}_2\text{-EDTA} \cdot 2\text{H}_2\text{O}$  50 mg, KOH 31 mg,  $\text{FeSO}_4 \cdot 7\text{H}_2\text{O}$  4.98 mg and  $\text{H}_2\text{SO}_4$  1  $\mu\text{L}$ , dissolved in 1 L of distilled water.

The organic matter: vitamin B<sub>1</sub> 0.1 mg, vitamin B<sub>6</sub> 0.5 mg, niacin 0.5 mg, inositol 0.1 g and glycine 0.02 g, dissolved in 1 L of distilled water.

AT salt medium: glucose 10 g,  $\text{KH}_2\text{PO}_4$  10.9 g,  $(\text{NH}_4)_2\text{SO}_4$  1 g,  $\text{MgSO}_4 \cdot 7\text{H}_2\text{O}$  0.16 g,  $\text{FeSO}_4 \cdot 7\text{H}_2\text{O}$ , 0.005 g,  $\text{CaCl}_2 \cdot 2\text{H}_2\text{O}$  0.011 g and  $\text{MnCl}_2 \cdot 4\text{H}_2\text{O}$  0.002 g, dissolved in 1 L of distilled water.

### Untargeted Metabolomics of Ac-14

Liquid sample (100  $\mu\text{L}$ ) and prechilled methanol (400  $\mu\text{L}$ ) were mixed well by vortexing. The samples were incubated on ice for 5 min and then centrifuged at 15,000 r/min, 4°C for 5 min. Part of supernatant was diluted to final concentration containing 53% methanol by LC-MS

grade water. The samples were subsequently transferred to a fresh Eppendorf tube, and then centrifuged at 15,000 g, 4°C for 10 min. Finally, the supernatant was injected into the LC-MS/MS system for analysis.

LC-MS/MS analyses were performed using a Vanquish UHPLC system (Thermo Fisher Scientific, MA, USA) coupled with an Orbitrap Q Exactive series mass spectrometer (Thermo Fisher Scientific, MA, USA). Samples were injected into a Hyperil Gold column (100 × 2.1 mm, 1.9 μm) using a 16 min linear gradient at a flow rate of 0.2 mL/min. The eluents for the positive polarity mode were eluent A (0.1% formic acid in water) and eluent B (Methanol). The eluents for the negative polarity mode were eluent A (5 mM ammonium acetate, pH 9.0) and eluent B (Methanol). The solvent gradient was set as follows: 2% B, 1.5 min; 2-100% B, 12.0 min; 100% B, 14.0 min; 100-2% B, 14.1 min; 2% B, 17 min. Q Exactive series mass spectrometer was operated in positive/negative polarity mode with spray voltage of 3.2 kV, capillary temperature of 320°C, sheath gas flow rate of 35 arb and aux gas flow rate of 10 arb.

The raw data files generated by UHPLC-MS/MS were processed using the Compound Discoverer 3.1 (CD3.1, Thermo Fisher Scientific, MA, USA) to perform peak alignment, peak picking, and quantitation for each metabolite. The main parameters were set as follows: retention time tolerance, 0.2 minutes; actual mass tolerance, 5 ppm; signal intensity tolerance, 30%; signal/noise ratio, 3; and minimum intensity, 100,000. After that, peak intensities were normalized to the total spectral intensity. The normalized data was used to predict the molecular formula based on additive ions, molecular ion peaks and fragment ions. And then peaks were matched with the mzCloud (<https://www.mzcloud.org/>), mzVault and MassList database to obtain the accurate qualitative and relative quantitative results.

Principal components analysis (PCA) and partial least squares discriminant analysis (PLS-DA) were performed at metaX (a flexible and comprehensive software for processing metabolomics data). We applied univariate analysis (*t*-test) to calculate the statistical

significance (*P*-value). Variable importance in the projection (VIP) value of the first principal component of PLS-DA model. The metabolites with VIP > 1 and *P*-value < 0.05 and fold change  $\geq 1.5$  or FC  $\leq 0.667$  were considered to be differential metabolites. Volcano plots were used to filter metabolites of interest which based on  $\log_2$  (FC) and  $-\log_{10}$  (*P*-value) of metabolites.

### **Cloning and Expression of the *Acinetobacter* sp. Ac-14 *gcd***

The sequence of Ac-14 *gcd* gene as follow:

```
atgaatcaactactcaagatcaggttaacgactttaccgtaattatttgggttactggcggttattcctgtaattggaggtattggctcgctacactaggc
ggttcaattactacattatagctggagtattactcctcattgttgcatggcaactctacaagcgtgcttctactgctttgtgggttatgctgcattaatgctaggaa
ctattatctggagtgtctgggaagttggaacagactttggcgcttgaccacgtttagatatttaggtattcttggttatggttattggtccggctgtaactcg
tggatcaacaaccttggatcaagtaaagttgccttacttcaactttagcaattgcaatcgtgtgatggttattctatctcaatgatccgcaagaaattaatggt
gaaatcaaacacctcaaccagaacagcccaagccgtgctggtgttctgaaagtattggccagcttatggccgactcaagcaggtgtgcgttattct
ccattgaaacagatcaatgacaaaacgtaaaagactgaaagttgcttggactttacgtactggcgatcttaagacagataacgattctggtgaaacgacca
atcaggttacaccgattaaatcggtaataacatgttatctgtacagctcaccagcagtttaattgcgattgatcctgctacaggtaaagaaaaatggcggtttga
tccgaaacttaaacggataaatgctccagcatttaactgtcgtggtgtgatgtactacgatgcaacaatacaactgagttgcaacagactctcaagcaa
gaaatctagctctacacaatgtccacgtaaggtattgtaccagcfaatgatggccgtttagtggctgtaaatgctgacactggtaaagcatgtactgactttggt
caaatggtcaagtgaactacaagagttcatgccatgcttatccaggcggtataaccgacatcctctggtatcgtgactggttcaactgtgttattgctg
gttctgtaacagataactactcaataaagagccatctggtgtgattcgtggatgatgtaaacactggtaaactctttgggtatttgatactggcgcagcaga
tccaaatgcaatgccggcggaaggtactactttgtcataactcaccaaatgcgtgggcacctttagcatagcgaactgatacgtttatgtaccaac
aggtgtaggtacaccagacatctgggggtgtgaccgtaccgagctgaaagagcgttatgcaactcaatgttagcgattaatgcttctactggtaaatagtgt
ggaactccaacaacctacagatttatgggatatggacgtaccatcacaccatctttagctgatatacaaaacaaagctggccaaactgttctgcaatc
tatgtattgacgaaaacaggtaatgcctttgtgcttgatgccgtaatgtgcaaccgattgttctgtaactgagaaaccggtccacaacagttaaacgtgga
ccacaactaaaggtgagttctattcaaaaactcagccattctctgacttgaacttggcgccacaagataaattgactgataaagacatgtgggggtgccactat
gcttgatcagctcatgtgctgtatcttcaaacgtctaattacgatggtattatacgcaccatctgaaaacggctacttttagttccctgtaacttaggtgtg
ttgaaatgggggtgtatgctagtaaccctgatcgtcaggtgtgtaatgaaccggattggtctgccattcgtcagctgttaattcctgctgatccaaaccgtg
cacaactgcaaaagggtcgggaactgagcaggggtacaaccgatgtacggcgctaccgtatggtgtgaaattagcgcattctatctccgcttggttacc
ttgtaaacaccggcttggggctatgtagctggcgttgattgaaaactcatgaagtggatggaaaaaacgtattggtacaattcgtgacagcttccgaact
gttccagttaccagctgtgaaaattggtgtgcctggttaggtgtcaatttctactgccggtaatgtcatgtttgtggtgcaactcaagataactactacgtg
cgttaacgttactaacgtaagaaacttgggaagcgcgttaccagcaggtggacaagcaacccaatgacttatgaaatcaatggtgaagcaatatgtgtg
aatcatggctggtggtcatggttcatttggtagaaaatggcgactatttagtgcttatgccttaccagataacaaataa
```

## Supplementary Tables

**Table S1** | The information of the isolated PSB strains with phosphate-solubilizing ability higher than 300 mg/L in liquid NBRIP medium.

**Table S2** | The SI value of *Acinetobacter* sp. Ac-14, *Paraburkholderia* sp. Pa-3, and *Pseudomonas* sp. Ps-12 under different concentrations of CaCO<sub>3</sub>.

**Table S1** | The information of the isolated PSB strains with phosphate-solubilizing ability higher than 300 mg/L in liquid NBRIP medium.

| Soil code | Strain code                 | Soluble P content (mg/L) | PSB species by 16S rDNA     |
|-----------|-----------------------------|--------------------------|-----------------------------|
| GJ2       | <b>Ac-14 (or 2GJ2-R-14)</b> | <b>441 ± 14</b>          | <i>Acinetobacter</i> sp.    |
| YY1       | 2YY1-RS-1                   | 405 ± 17                 |                             |
| GJ2       | 2GJ2-R-2                    | 394 ± 29                 |                             |
| GJ2       | 2GJ2-RS-5                   | 392 ± 35                 |                             |
| GJ2       | 2GJ2-RS-2                   | 381 ± 11                 |                             |
| GJ2       | 2GJ2-RS-3                   | 369 ± 15                 |                             |
| GJ2       | 162GJ2-R-7                  | 365 ± 11                 |                             |
| XB1       | <b>Pa-3 (or 3XB1-R-3)</b>   | <b>330 ± 19</b>          | <i>Paraburkholderia</i> sp. |
| NY1       | <b>Ps-12 (or 2NY1-R-12)</b> | <b>413 ± 20</b>          | <i>Pseudomonas</i> sp.      |
| NY1       | 2NY1-R-4                    | 408 ± 12                 |                             |
| HT1       | 3HT1-RS-1                   | 393 ± 10                 |                             |
| GY1       | 2GY1-RS-17                  | 381 ± 20                 |                             |
| CX3       | 2CX3-RS-1                   | 380 ± 17                 |                             |
| XQ1       | 3XQ1-RS-4                   | 367 ± 20                 |                             |
| EJ1       | 2EJ1-RS-8                   | 365 ± 18                 |                             |
| EJ1       | 2EJ1-R-6                    | 363 ± 16                 |                             |
| HZ1       | 3HZ1-R-4                    | 362 ± 13                 |                             |
| CX1       | 2CX1-NR-15                  | 354 ± 3                  |                             |
| CX2       | 1CX2-R-8                    | 335 ± 15                 |                             |
| CX1       | 2CX1-NR-3                   | 333 ± 16                 |                             |
| GJ3       | 1GJ3-RS-30                  | 325 ± 15                 |                             |
| HZ1       | 3HZ1-R-1                    | 321 ± 17                 |                             |

Note: mean ± standard deviation ( $n = 3$ ).

**Table S2** | The SI value of *Acinetobacter* sp. Ac-14, *Paraburkholderia* sp. Pa-3, and *Pseudomonas* sp. Ps-12 under different concentrations of CaCO<sub>3</sub>.

| <b>CaCO<sub>3</sub> concentration (g/L)</b> | <b>Ac-14</b> | <b>Pa-3</b> | <b>Ps-12</b> |
|---------------------------------------------|--------------|-------------|--------------|
| 0                                           | 1.75 ± 0.36  | 2.42 ± 0.39 | 1.25 ± 0.09  |
| 0.5                                         | 1.62 ± 0.26  | 2.28 ± 0.43 | 1.27 ± 0.15  |
| 1.0                                         | 1.74 ± 0.41  | 1.66 ± 0.57 | /            |
| 1.5                                         | 1.87 ± 0.38  | 1.78 ± 0.40 | /            |
| 2.0                                         | 2.00 ± 0.38  | 2.24 ± 0.49 | /            |

/, not determined.

## Supplementary Figures

**Figure S1** | The halos of colony, cell morphology revealed by scanning electron microscopy, and gram staining of *Acinetobacter* sp. Ac-14, *Paraburkholderia* sp. Pa-3, and *Pseudomonas* sp. Ps-12.

**Figure S2** | Phylogenetic tree based on the 16S rDNA sequences of *Acinetobacter* sp. Ac-14, *Paraburkholderia* sp. Pa-3, and *Pseudomonas* sp. Ps-12.

**Figure S3** | The phosphate-solubilizing halo zone of the strains Ac-14, Pa-3, and Ps-12 under different concentrations of  $\text{CaCO}_3$ .

**Figure S4** | Effects of PSB strains on the growth of *Arabidopsis thaliana* seedlings after cocultivation for 7 days.

**Figure S5** | Multivariate statistical analysis of untargeted metabolomics data obtained using the LC-MS/MS approach.

**Figure S6** | The phosphate-solubilizing ability, pH value and  $A_{600}$  value of *Acinetobacter* sp. Ac-14 under different nitrogen sources.

**Figure S7** | Effect of different pH on the growth of *Acinetobacter* sp. Ac-14.



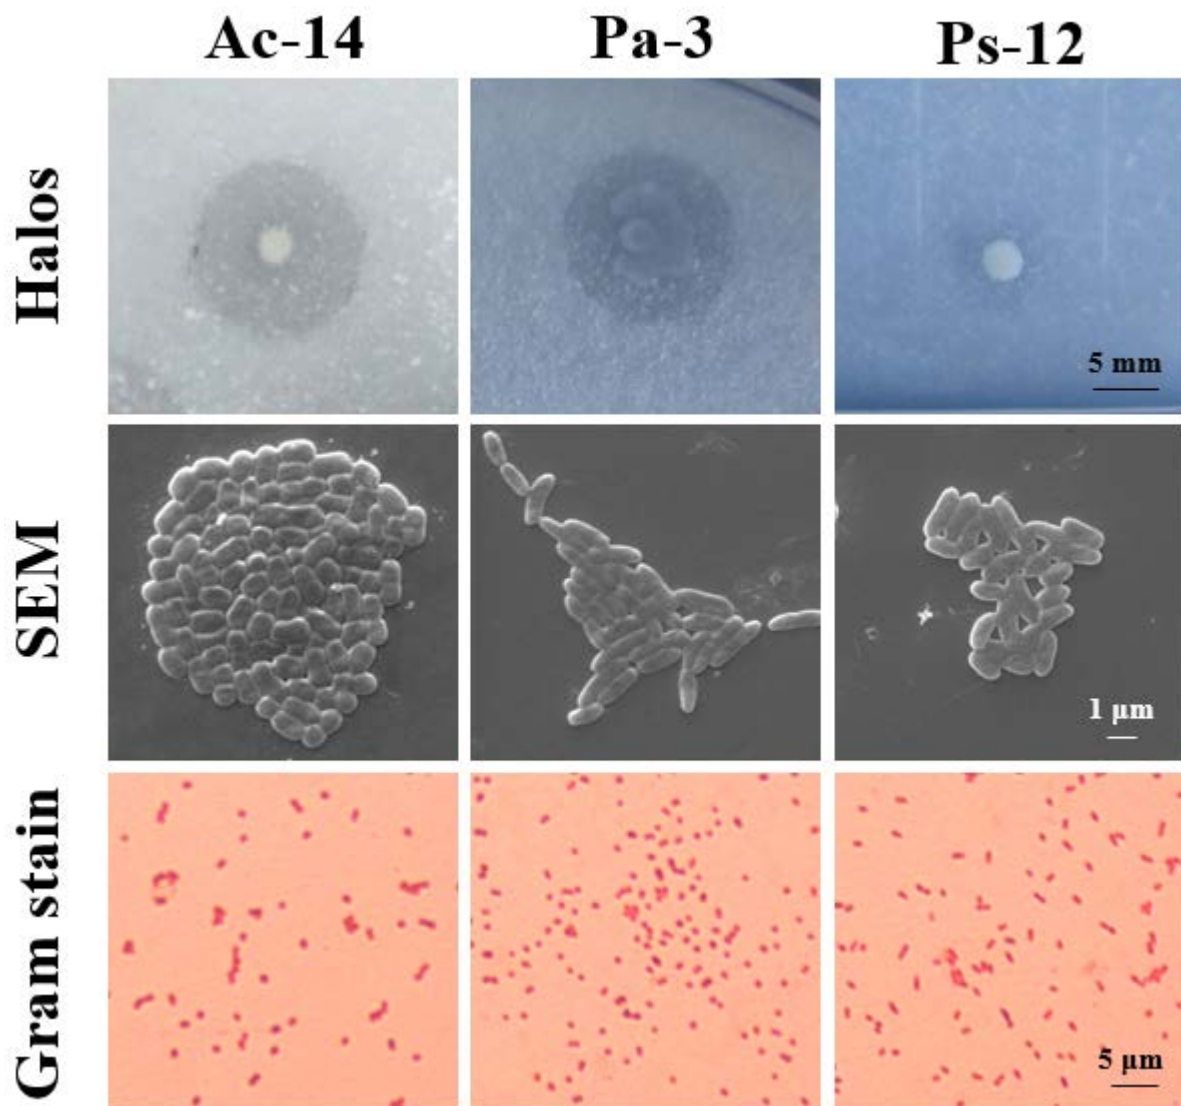

**Figure S1** | The halos of colony, cell morphology revealed by scanning electron microscopy, and gram staining of *Acinetobacter* sp. Ac-14, *Paraburkholderia* sp. Pa-3, and *Pseudomonas* sp. Ps-12.

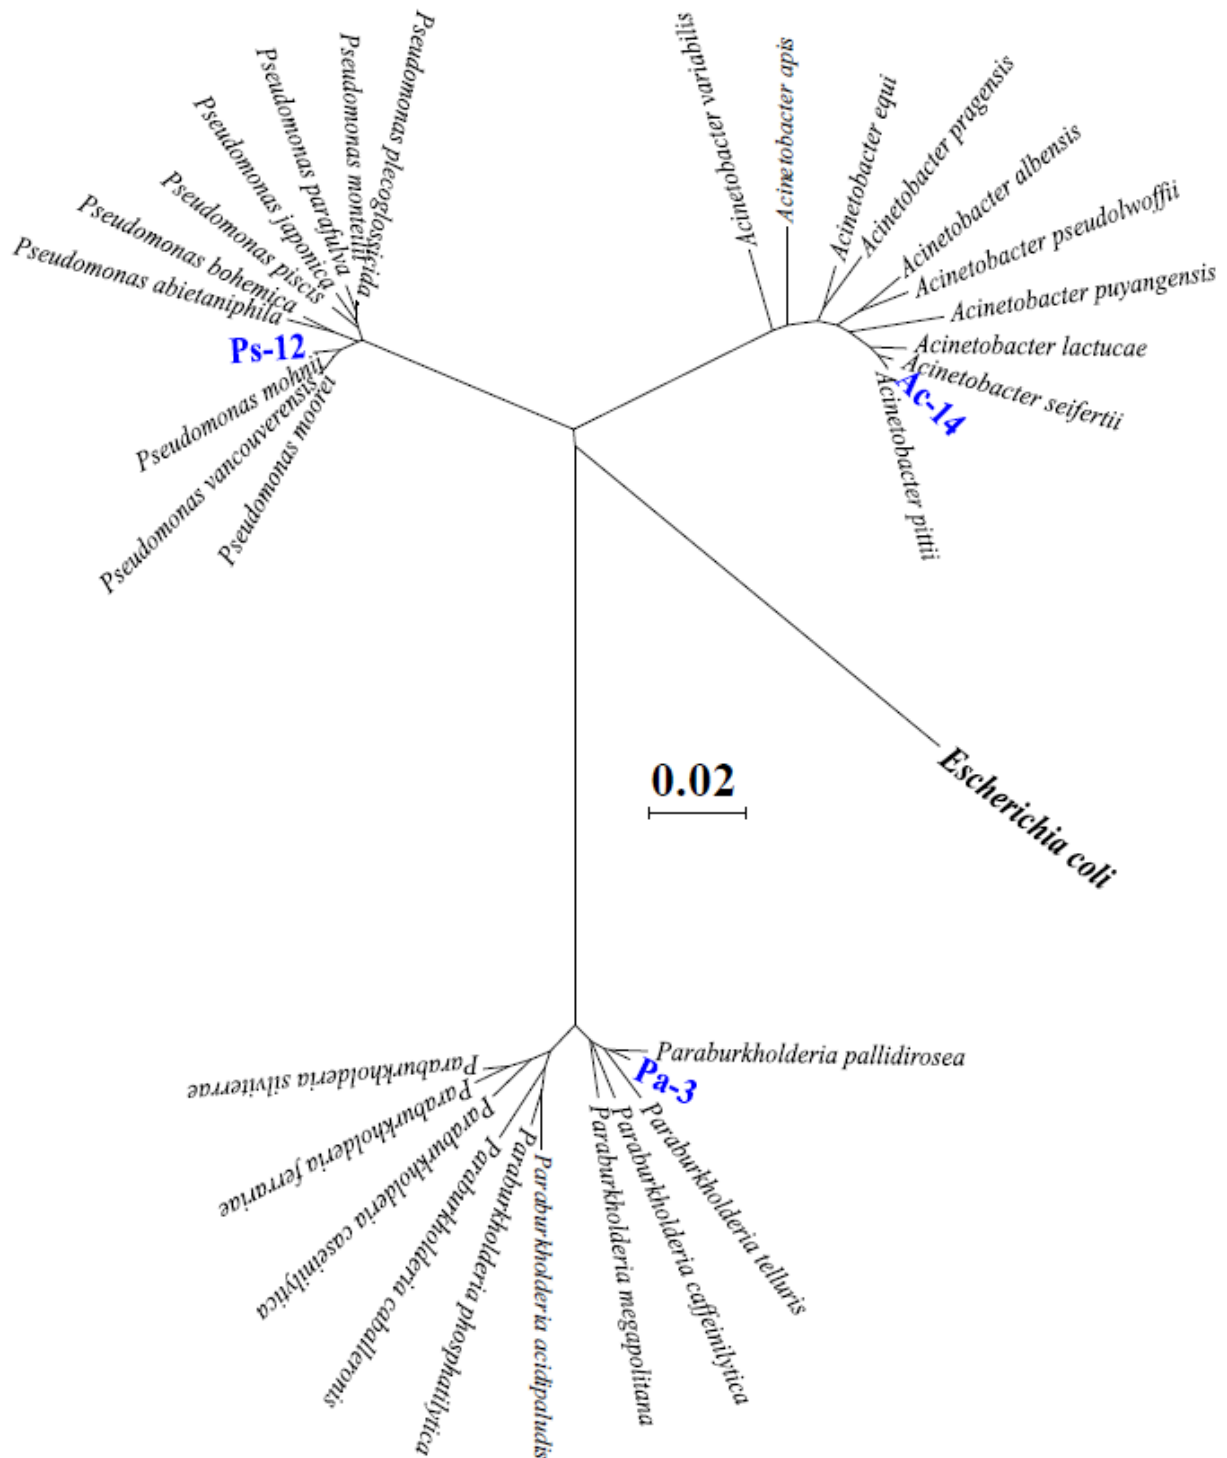

**Figure S2** | Phylogenetic tree based on the 16S rDNA sequences of *Acinetobacter* sp. Ac-14, *Paraburkholderia* sp. Pa-3, and *Pseudomonas* sp. Ps-12. *Escherichia coli* K12 was outgroup. The type strains, *Acinetobacter albensis* (KR611798.1), *Acinetobacter apis* (JX402203.1), *Acinetobacter equi* (KC494698.1), *Acinetobacter lactucae* (KU921101.1), *Acinetobacter pittii* (FJ694758.1), *Acinetobacter pragensis* (KX014586.1), *Acinetobacter pseudolwoffii*

(PHRG01000001.1), *Acinetobacter puyangensis* (JN664255), *Acinetobacter seifertii* (FJ860878.1), *Acinetobacter variabilis* (KP278590.1), *Paraburkholderia acidipaludis* (AB537485), *Paraburkholderia caballeroni* (EF139186) *Paraburkholderia caffeinilytica* (KT607985), *Paraburkholderia caseinilytica* (MF950896), *Paraburkholderia ferrariae* (AB537487), *Paraburkholderia megapolitana* (AM489502), *Paraburkholderia pallidirosea* (KP938221), *Paraburkholderia phosphatilytica* (MH393406), *Paraburkholderia silviterrae* (MF979829), *Paraburkholderia telluris* (MF979827), *Pseudomonas abietaniphila* (AJ011504.1) *Pseudomonas bohemica* (MG190030.1), *Pseudomonas japonica* (AB681920.1), *Pseudomonas mohnii* (AM293567.1), *Pseudomonas monteirii* (AB681966.1), *Pseudomonas moorei* (AM293566.1), *Pseudomonas parafulva* (AB681092.1), *Pseudomonas plecoglossicida* (AB681970.1), *Pseudomonas piscis* (LC500601.1), *Pseudomonas vancouverensis* (AJ011507.1). The 16S rDNA sequences of the isolated strains were submitted to GenBank under accession numbers MW011756 for Ac-14, MW011757 for Pa-3 and MW011758 for Ps-12. The scale bar indicates 0.02 substitutions per nucleotide position.

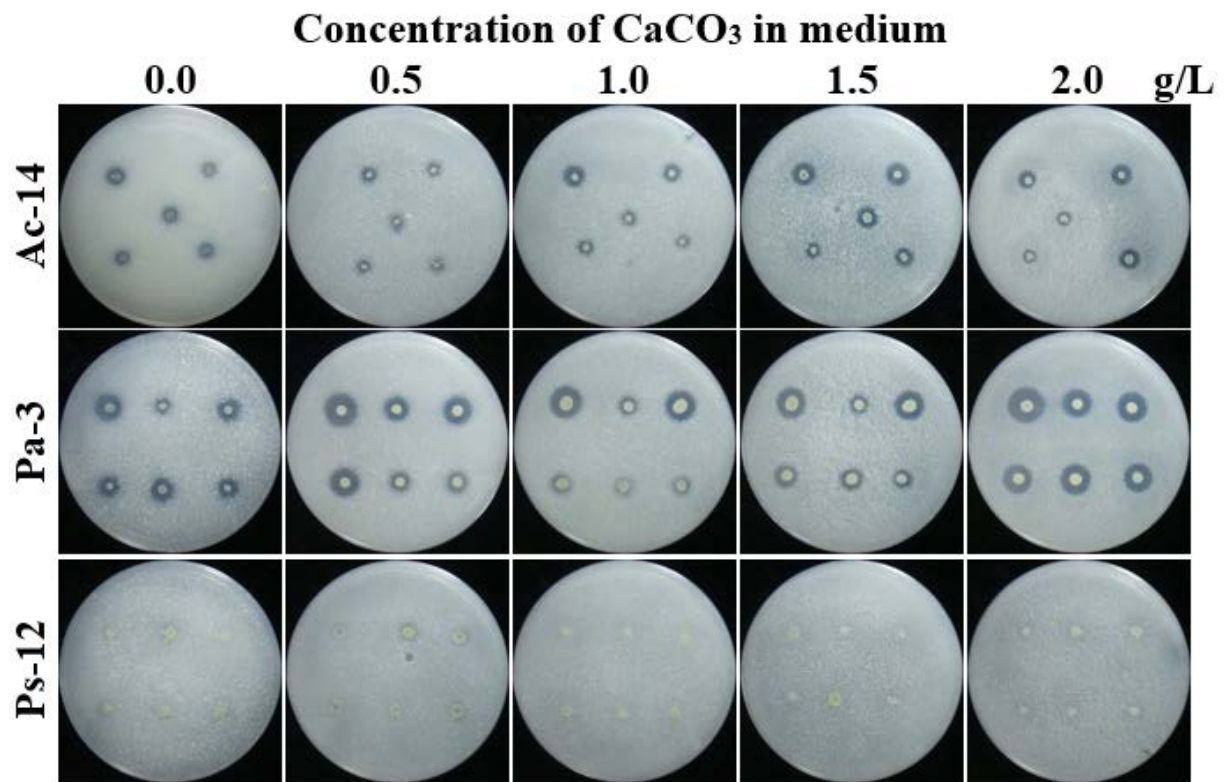

**Figure S3** | The phosphate-solubilizing halos of the strains Ac-14, Pa-3, and Ps-12 under different concentrations of CaCO<sub>3</sub>.

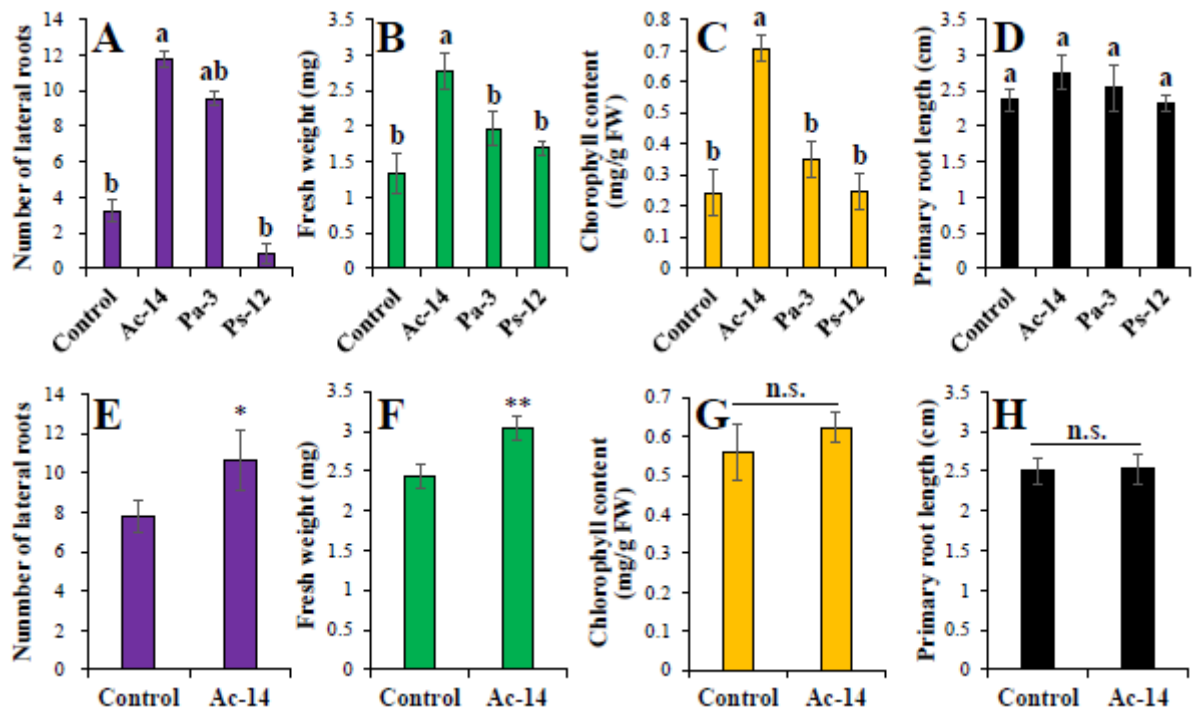

**Figure S4** | Effects of PSB strains on the growth of *Arabidopsis thaliana* seedlings after cocultivation for 7 days. (A-D) *A. thaliana* seedlings cocultured with the strains Ac-14, Pa-3, and Ps-12 in NBRIP agar-solidified medium. (A) The number of lateral roots, (B) fresh weight of per plant, (C) chlorophyll content, and (D) primary root length of *A. thaliana*. (E-H) *A. thaliana* seedlings cocultured with strain Ac-14 in NBRIP agar-solidified medium containing 0.5 g/L CaCO<sub>3</sub>. (E) The number of lateral roots, (F) fresh weight of per plant, (G) chlorophyll content, and (H) primary root length of *A. thaliana*. Different lowercase letters indicated statistically significant differences ( $P < 0.05$ ). \*,  $P < 0.05$ ; \*\*,  $P < 0.01$ ; n.s., no significant difference.

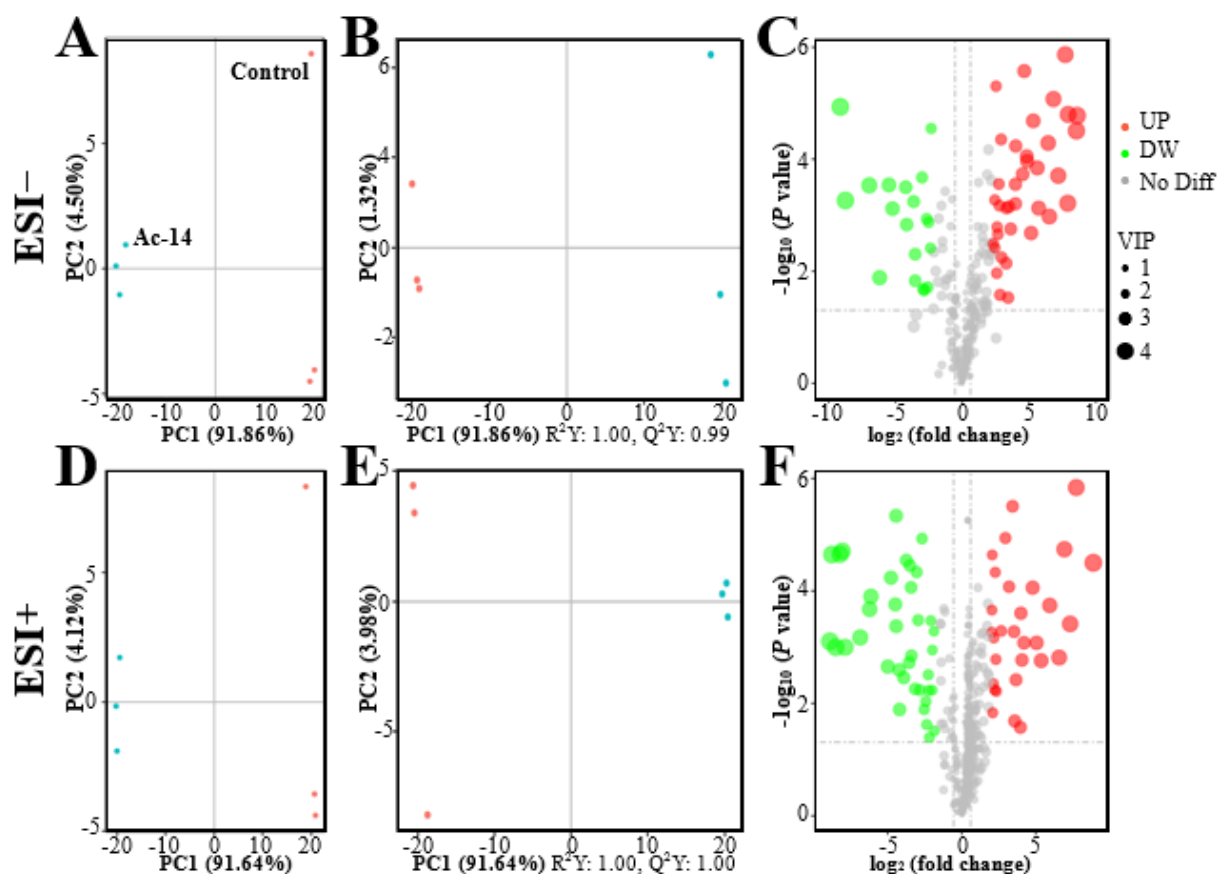

**Figure S5** | Multivariate statistical analysis of untargeted metabolomics data obtained using the LC-MS/MS approach. PCA score plots of metabolomics data for *Acinetobacter* sp. Ac-14 (blue) and control (red) obtained by (A) LC-MS (ESI<sup>-</sup>), and (D) LC-MS (ESI<sup>+</sup>). PLS-DA score plots of metabolomics data obtained by (B) LC-MS (ESI<sup>-</sup>), and (E) LC-MS (ESI<sup>+</sup>). Volcano plots of (C) LC-MS (ESI<sup>-</sup>), and (F) LC-MS (ESI<sup>+</sup>). Red or green circles indicate the numbers and tendency (red, up; green, down; grey, no different) of metabolites to separate in the model when strain Ac-14 are compared with control group.

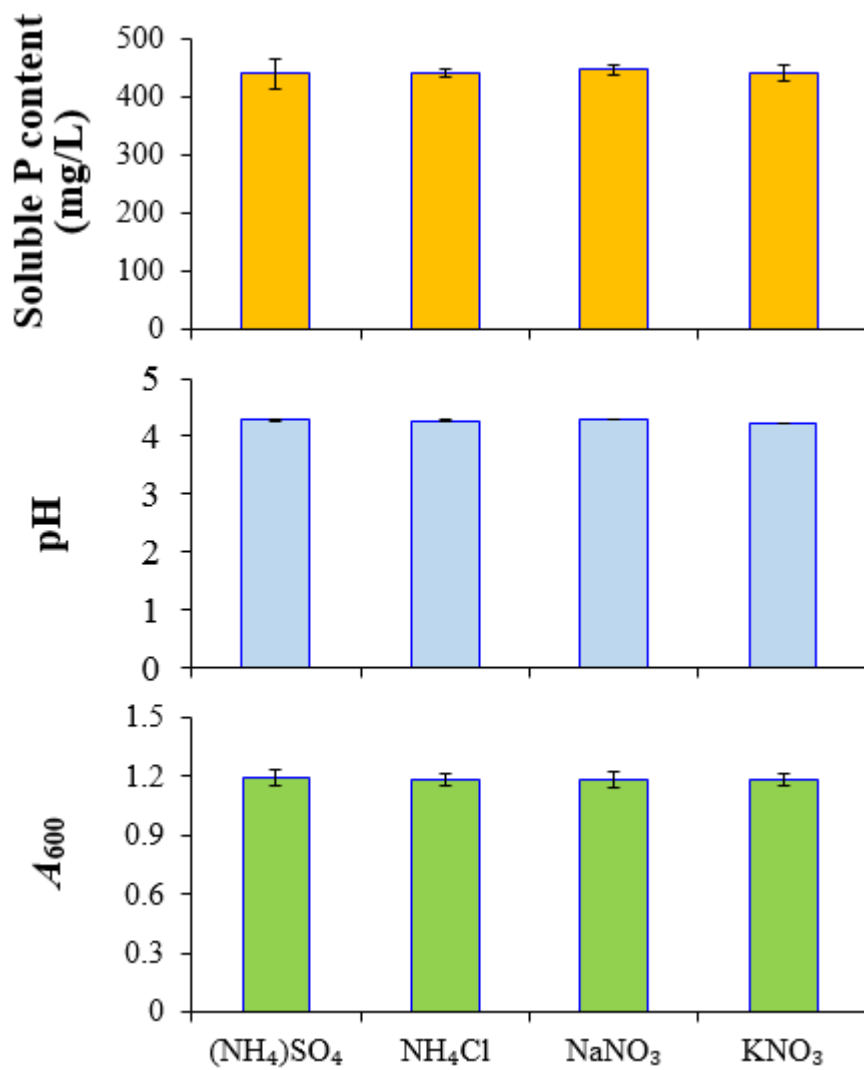

**Figure S6** | The phosphate-solubilizing ability, pH value and  $A_{600}$  value of *Acinetobacter* sp. Ac-14 under different nitrogen sources.

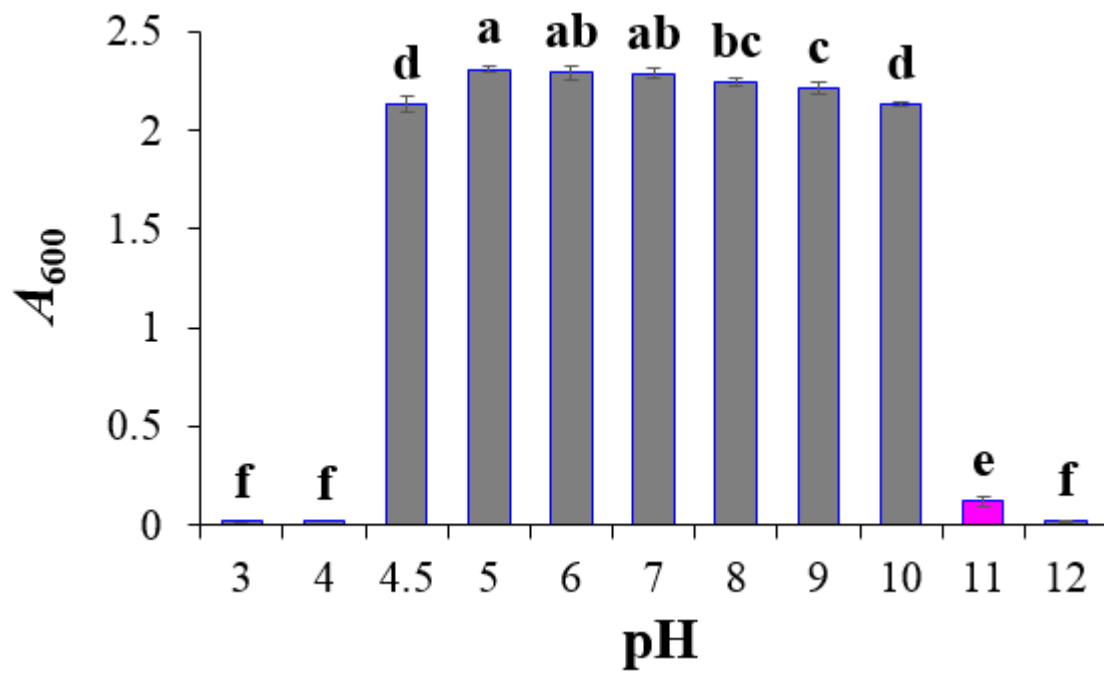

**Figure S7** | Effect of different pH on the growth of *Acinetobacter* sp. Ac-14. Different lowercase letters indicated statistically significant differences ( $P < 0.05$ ).



**Supplementary “Excel S1” file**

**Excel S1.** Detailed information about the differential metabolites and all metabolites detected by LC-MS (ESI<sup>-</sup>) and LC-MS (ESI<sup>+</sup>). (See separate “**Excel S1**”file)
